# Supplementary material
Source: PubMed Central journal article supplement (PMC5500157)
Supplement: 1645FileS2.pdf [file 1645FileS2.pdf]

**Resolving the complex genetic basis of phenotypic variation and variability of cellular growth – Supplementary material**

Naomi Ziv, Bentley M. Shuster, Mark L. Siegal and David Gresham

# Figure S1

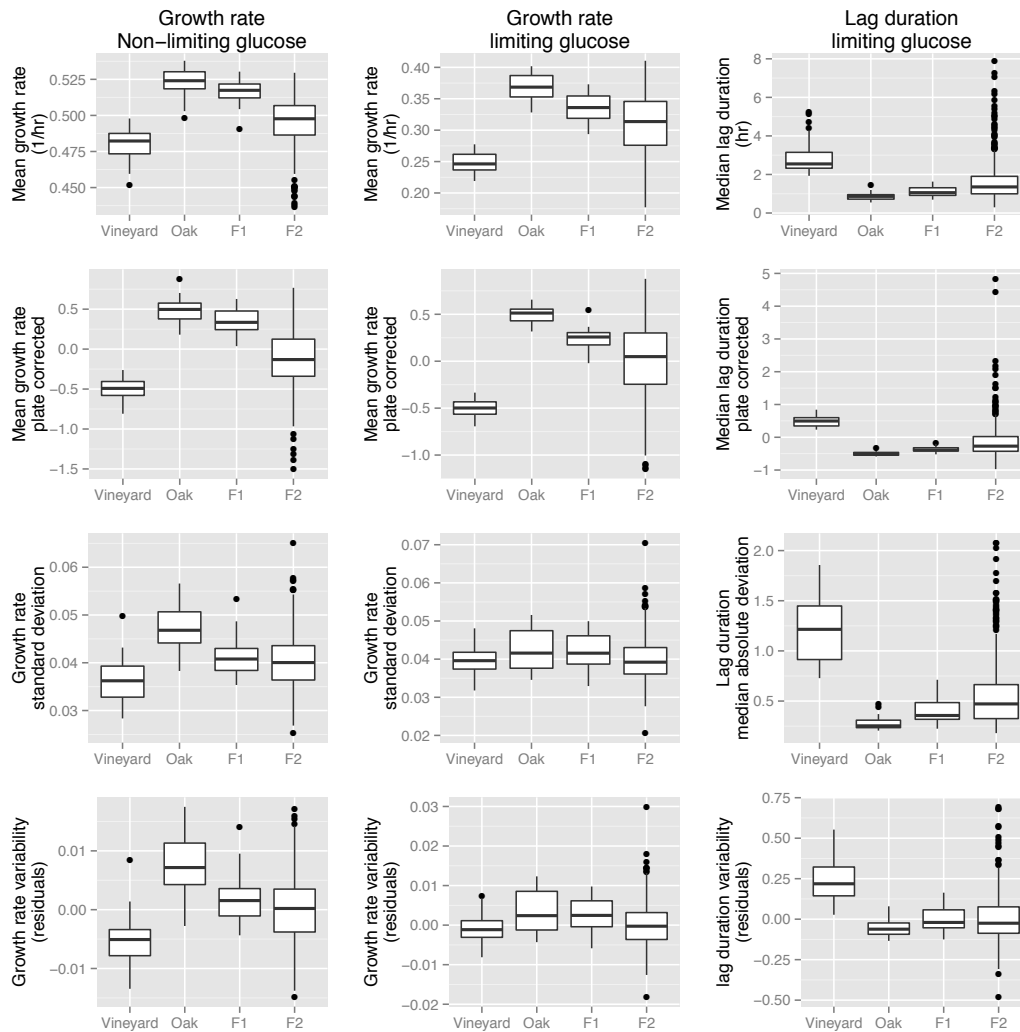

**Figure S1 - Cell growth traits for parental, F1 and F2 strains.**

Estimates of central tendency and variability for growth rate and lag duration distributions. The parental and F1 strains are represented by 24 values (4 wells X 6 plates) measured in each condition. The 477 F2 strains are represented by one well per strain per condition. The first row of panels displays the original central tendency measurements and the second row displays the plate corrected central tendency measurements, which were used for mapping phenotypic variation. The third row displays the original dispersion estimates and the fourth row displays the residuals from loess regressions, which were used for mapping phenotypic variability.

# Figure S2

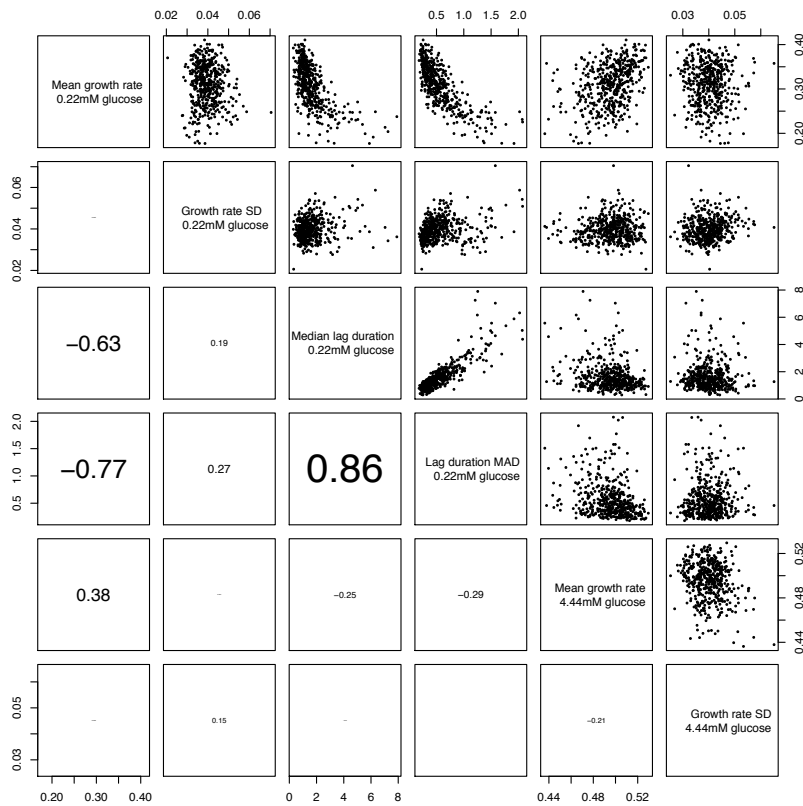

**Figure S2 - Correlations between cell growth traits.**

Trait values correspond to measurements from each well for all F2 segregants phenotyped. Data are displayed in the upper triangle and the linear Pearson correlation values are given in the lower triangle. The size of the text corresponds to strength of the correlation estimate.

# Figure S3

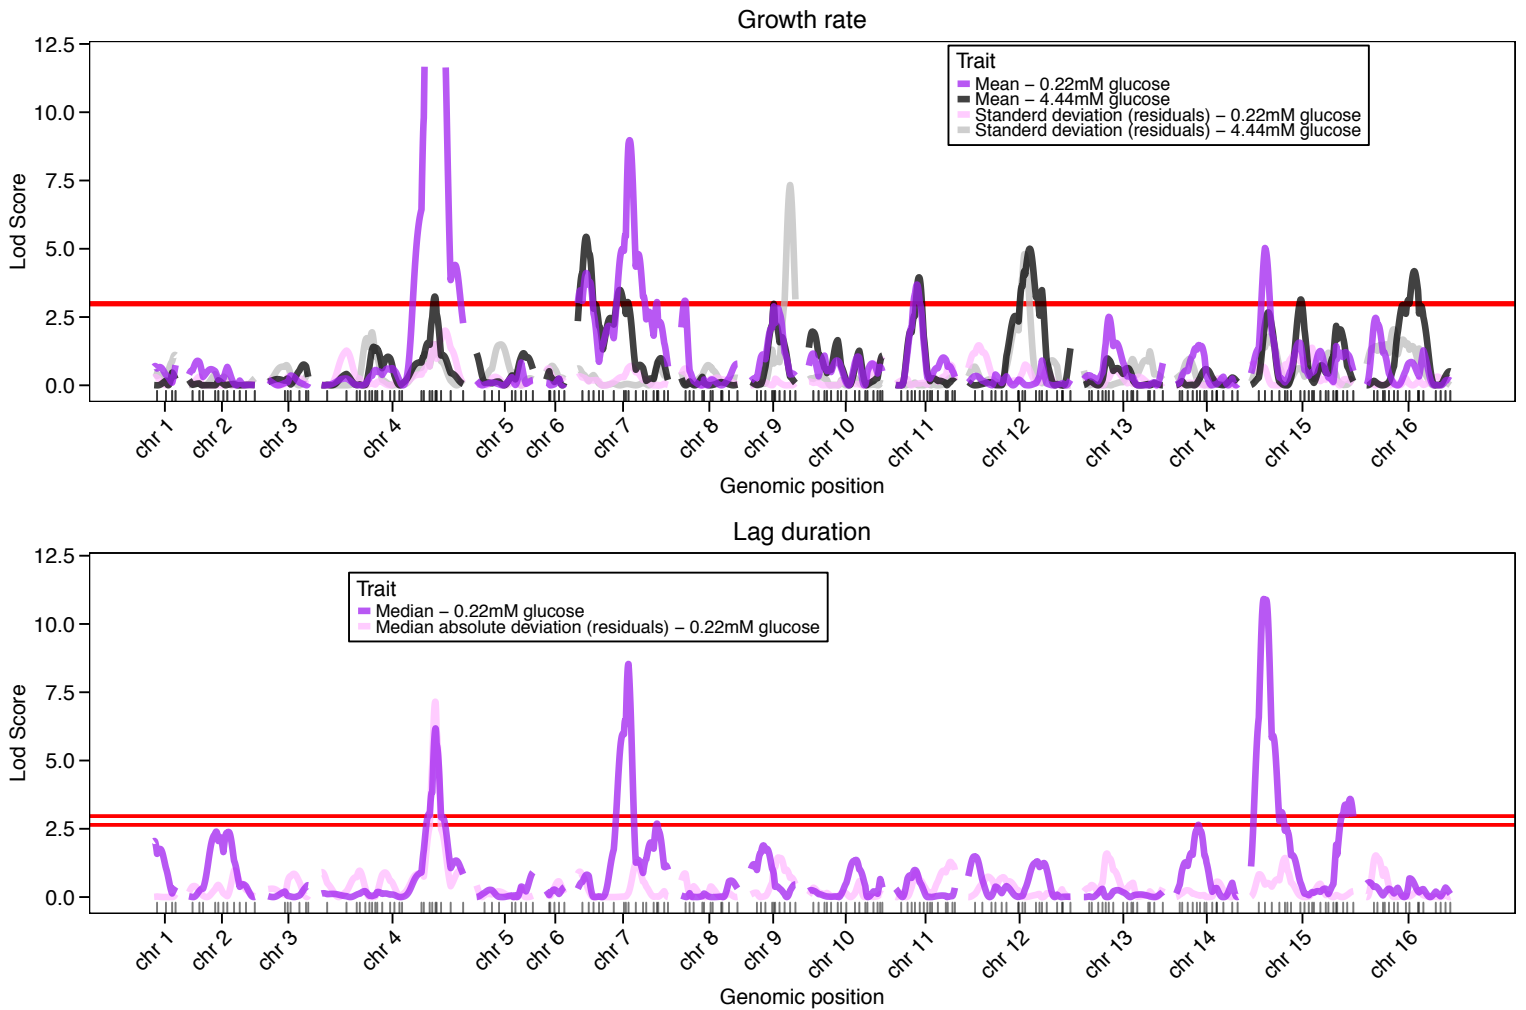

LOD profiles using a single-QTL model were determined by performing interval mapping using 374 F2 segregants assayed for growth rate variation and variability (upper panel) and lag duration variation and variability (lower panel) in two different glucose concentrations. The colors represent the combination of trait and environment as specified in the legend. Black tick marks on the x-axes represent marker locations. The y-axes are limited to a LOD score of 12 for clarity. The QTL underlying variation in growth rate in 0.22mM glucose on chromosome IV reaches a maximum value of 41.8.

# Figure S4

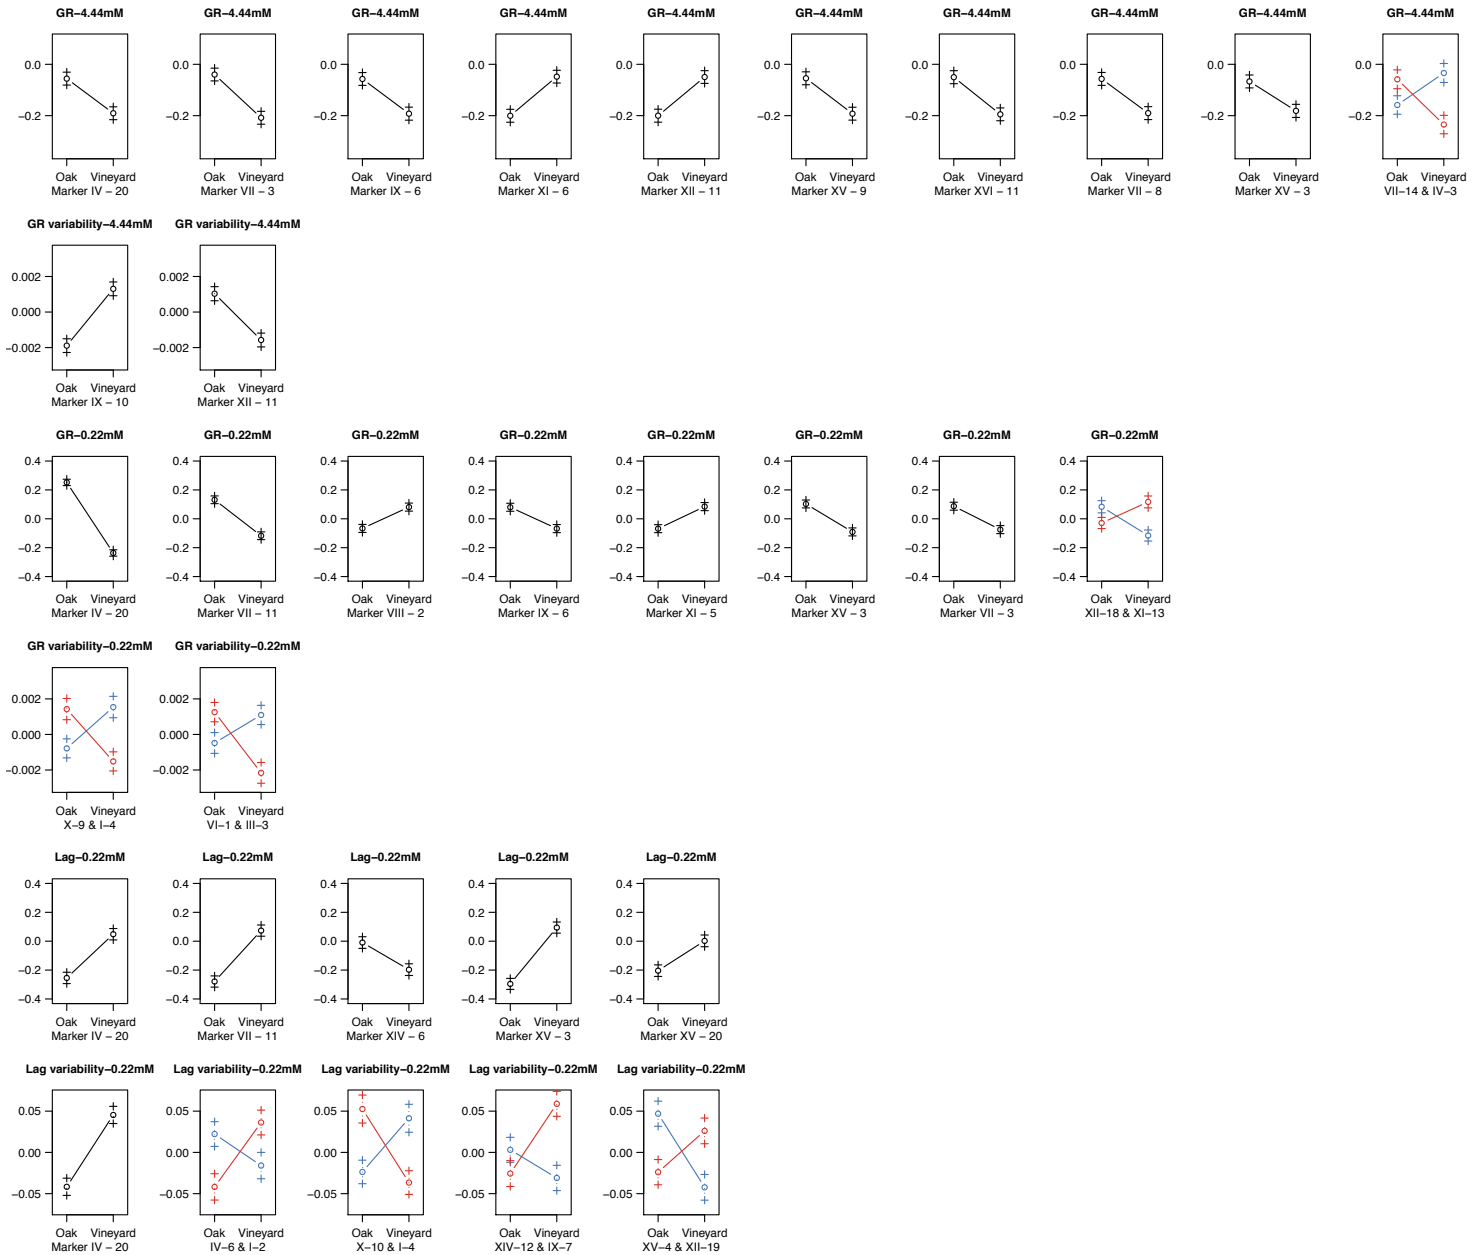

**Figure S4 - Effect sizes for additive QTL and genetic interactions.**

Each row represents a single trait for either growth rate (GR) or lag variation or variability measured in the specified glucose environment. Plots depicting additive loci correspond to trait means and standard errors for the oak and vineyard genotype class at the closest marker. Plots depicting genetic interactions correspond to trait means and standard errors for the four genotype combinations at closest markers; the x axis corresponds to first marker and colors represent the genotype at the second marker as either oak (blue) or vineyard (red). To interpret the magnitude of effects, consider that for central tendency variation traits, normalization results in a difference of 1 unit between parental genotypes, ranging from -0.5 (vineyard phenotypic value) to 0.5 (oak phenotypic value). For phenotypic variability, trait values represent residuals from a loess regression (see methods).

# Figure S5

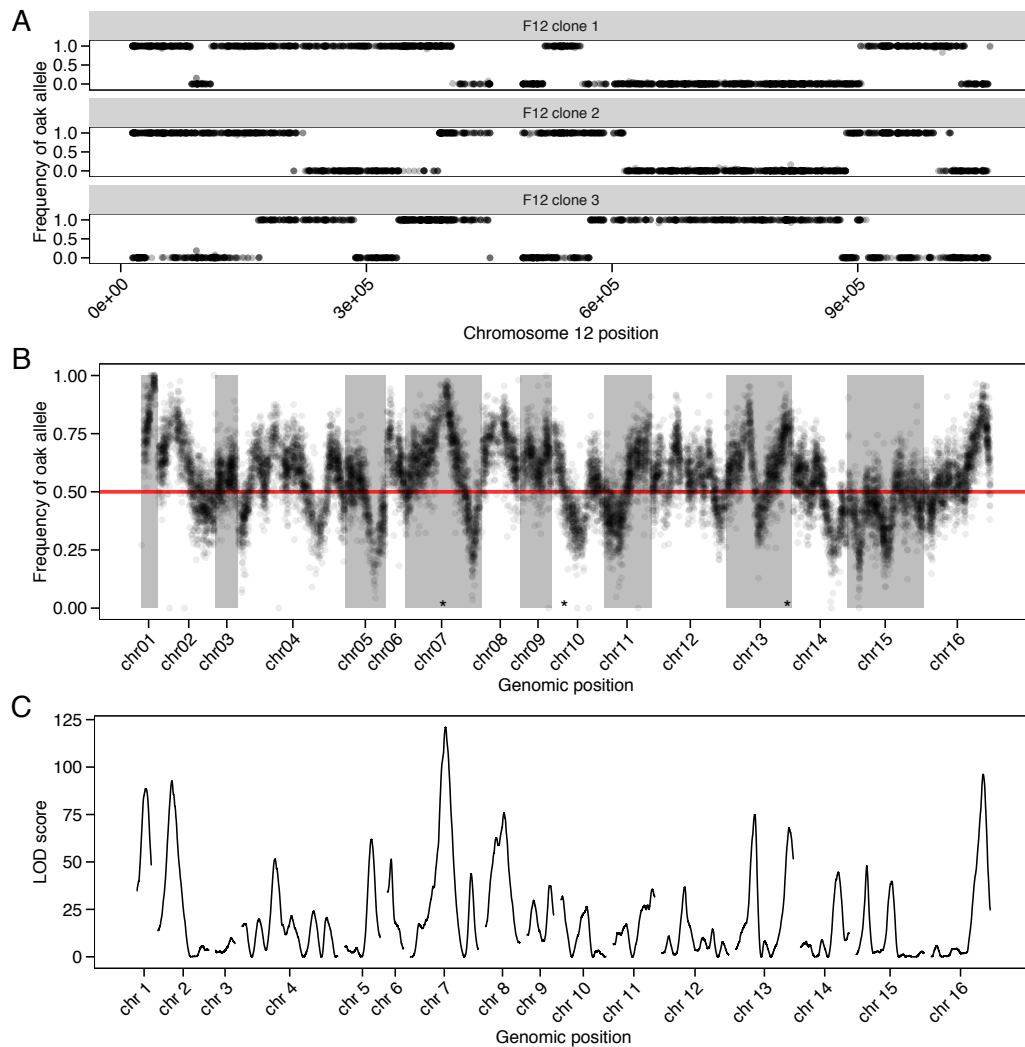

**Figure S5 - Allele frequencies and genetic mapping in an advanced intercross population.**

(A) Allele frequencies for chromosome 12 in three advanced intercross F12 clones. (B) Allele frequencies in the final advanced intercross population following eleven rounds of random mating. SNPs with minor allele frequencies <10% in the F1 heterozygote were excluded. The three major sporulation efficiency QTL known to segregate in this cross are indicated by asterisks (nearest marker). (C) MULTIPOOL LOD score results for the advanced intercross population determined using parameter values of  $n=1000$  (number of individuals),  $r=2500$  (length of cM) and  $\text{mode}=\text{replicates}$ .

# Figure S6

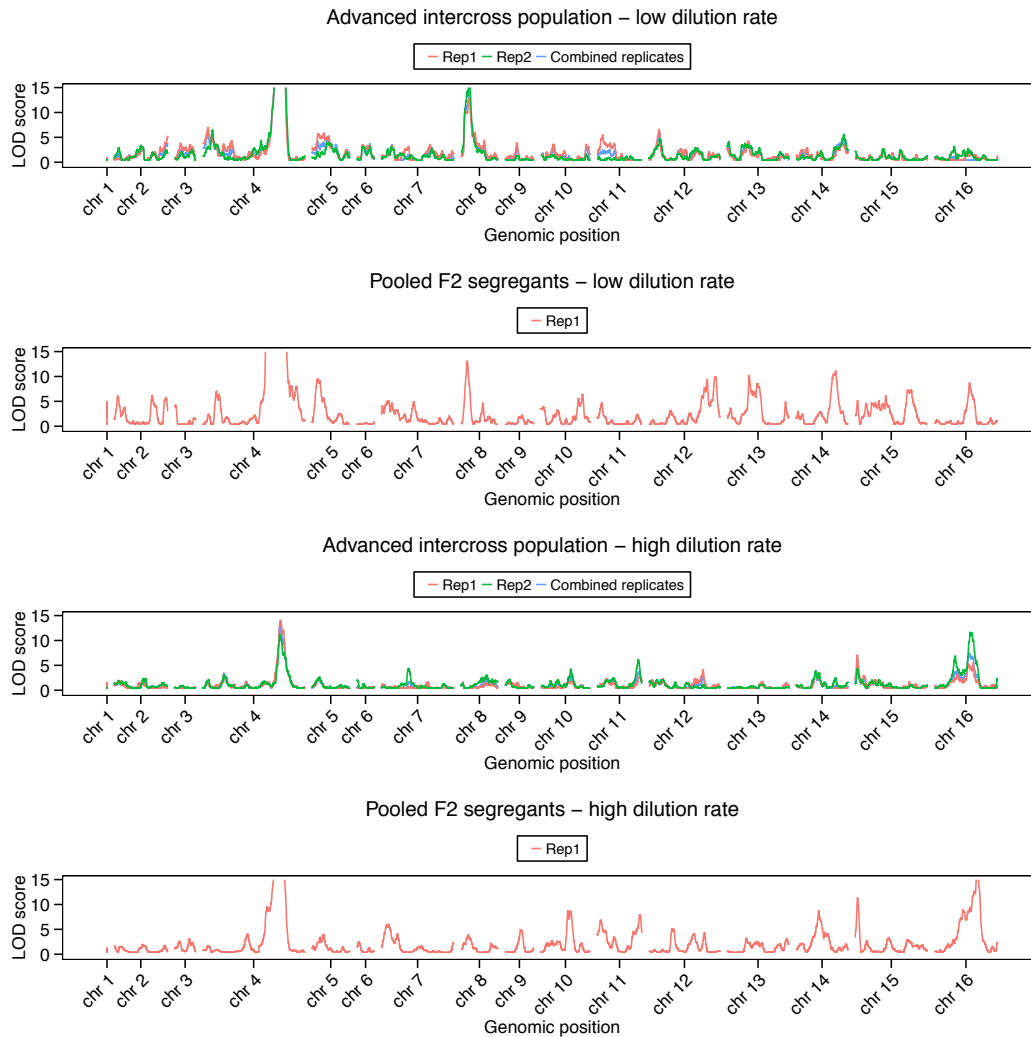

**Figure S6 - MULTIPOOL-generated genome-wide LOD profiles.**

LOD profiles generated using MULTIPOOL are based on allele frequency differences following selection in chemostats at either a low (0.18) or high (0.35) dilution rate. Panels represent different mapping populations and selective conditions. Individual replicates or combined scores, generated by summing reads per SNP for both replicates, are shown. The y-axes are limited to a LOD score of 15 for clarity. The QTL on chromosome IV for the advanced intercross selected in the low dilution rate reaches a maximum of 54.97. MULTIPOOL results are shown with parameter values of  $n=1000$  and  $r=1000$ .

Note on chromosome XVI peaks in the pooled F2 samples: In the high dilution rate, the proportion of oak alleles increased, matching the environmental specific effects seen in the interval mapping and the advanced intercross population. In the low dilution rate, the LOD peak corresponds to increases in the vineyard alleles, not supported by the interval mapping or the advanced intercross population.

# Figure S7

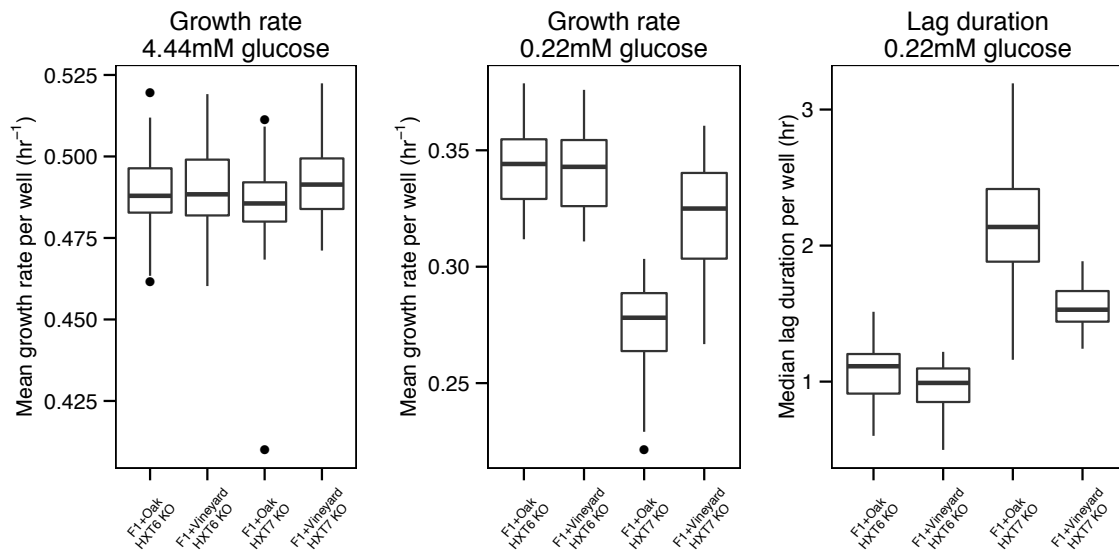

**Figure S7 - Phenotypic analysis of HXT6 and HXT7 reciprocal hemizygotes.**

Distributions of mean growth rate or median lag duration per well for strains that are hemizygous for just one of the duplicate gene pair, HXT6 and HXT7. Data are from measurement of 34-48 wells (across 4 plates) per strain and condition combination.



# Figure S8

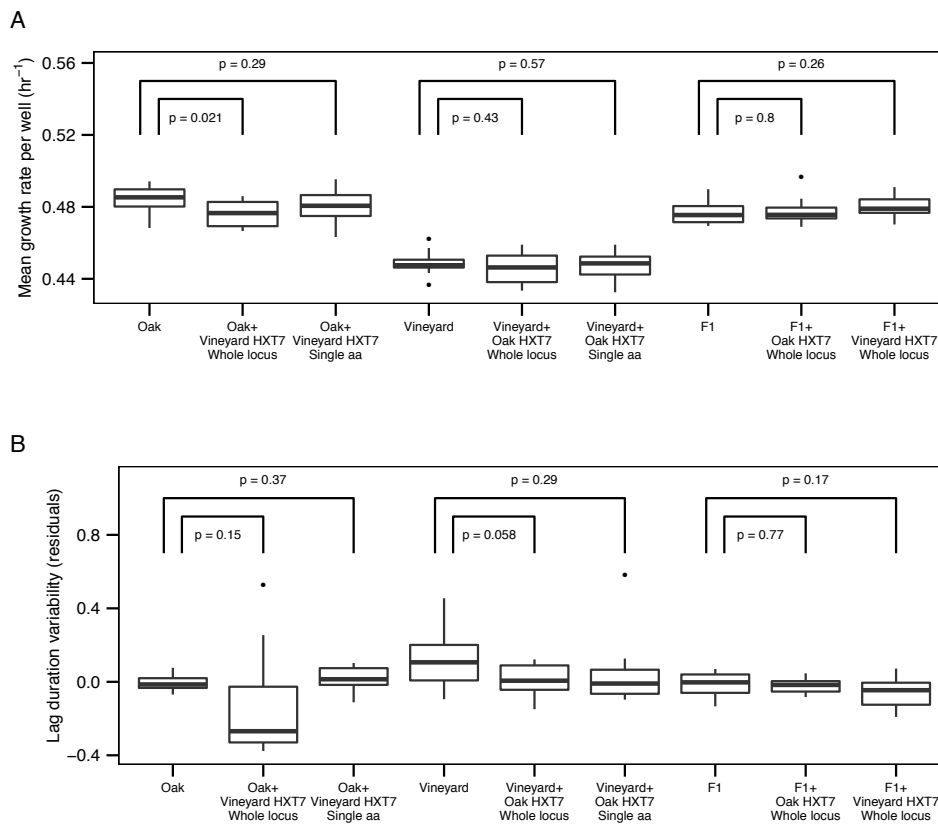

**Figure S8 - Growth rate in non-limiting glucose conditions and lag duration variability in limiting glucose condition for HXT7 allele replacement strains.**

Distributions of (A) mean growth rate in 4.44mM glucose or (B) lag variability in 0.22mM glucose for HXT7 allele replacement strains. P-values are for two sample t-tests, n=12 (4 wells x 3 plates) for each strain.

# Figure S9

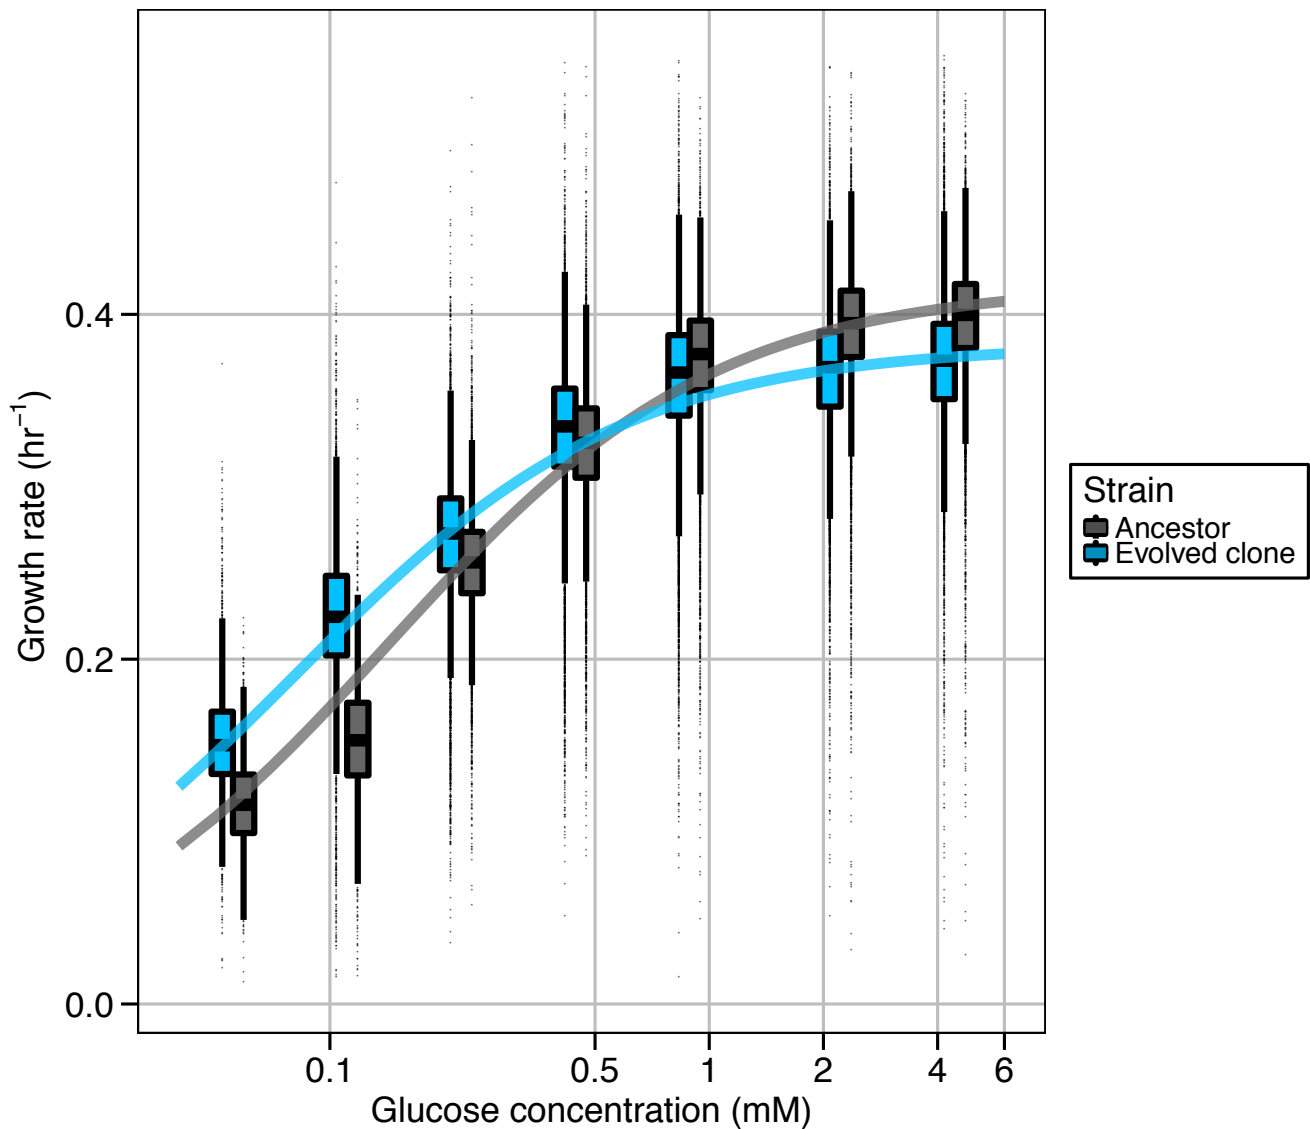

**Figure S9 - HXT6/7 amplification confers a growth advantage only at limiting glucose concentrations.**

The evolved clone contains a HXT6/7 amplification that is not present in the ancestor. Solid curves depict best fit of the Monod equation to normalized data, see (Ziv et al. 2013). Data are from measurement of 12 wells (across 4 plates) per strain and condition combination. Estimated  $\mu_{\text{Max}}$  and  $K_S$  values are 0.417hr<sup>-1</sup> and 0.14mM for the ancestor and 0.38 hr<sup>-1</sup> and 0.08mM for the evolved strain.

Ziv N., Siegal M. L., Gresham D., 2013 Genetic and Nongenetic Determinants of Cell Growth Variation Assessed by High-Throughput Microscopy. *Mol. Biol. Evol.* 30: 2568–2578.

# Figure S10

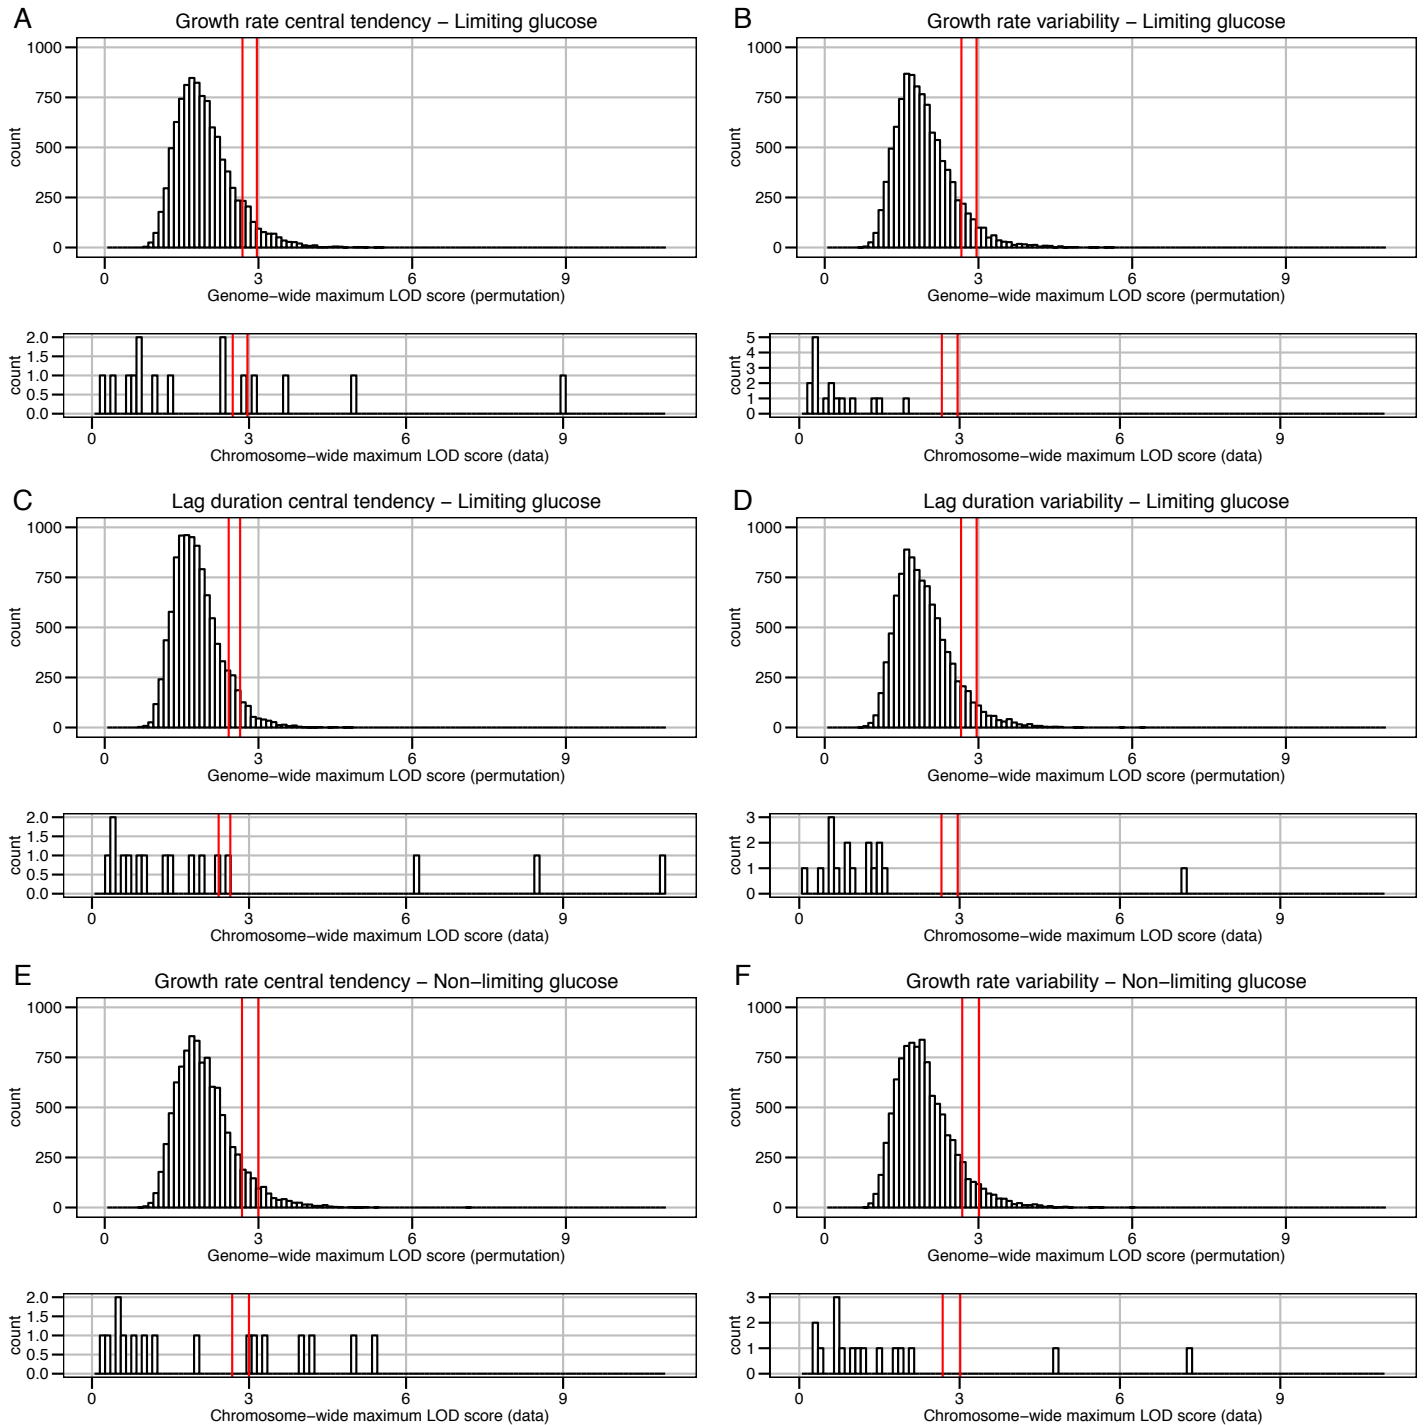

**Figure S10 - Permutations for single QTL genome scans.**

Empirical null distributions obtained by 10,000 permutations (upper panels) and distributions of chromosome maximums (lower panels). Each permutation retains the maximum LOD score for each trait (upper panels). Red vertical lines correspond to 0.1 and 0.05 significance thresholds. (A) Mean growth rate in 0.22mM glucose, (B) growth rate variability in 0.22mM glucose, (C) median lag duration in 0.22mM glucose, (D) lag variability in 0.22mM glucose, (E) mean growth rate in 4.44mM glucose, (F) growth rate variability in 4.44mM glucose. The x-axes are limited to a LOD score of 11 for clarity. Chromosome IV maximum for mean growth rate in 0.22mM glucose reaches a maximum value of 41.8.

# Figure S11

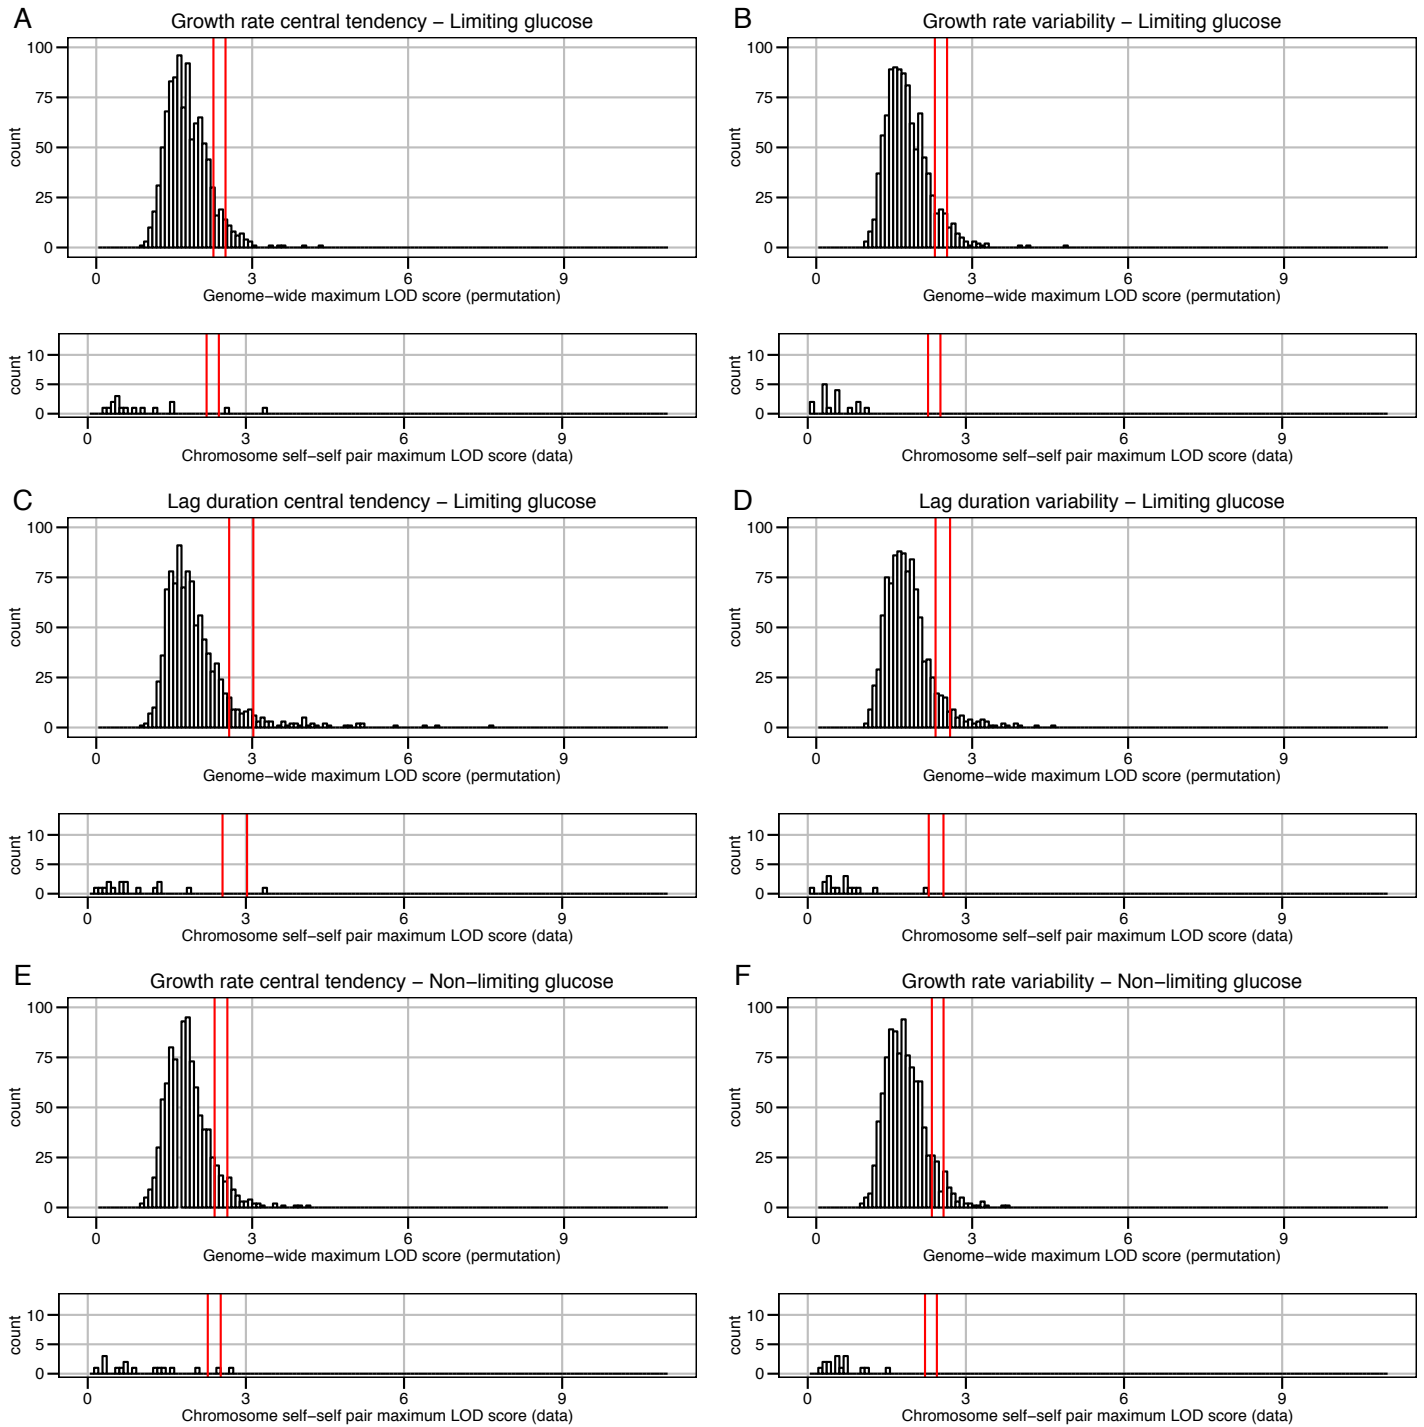

**Figure S11 - Permutations for two QTL genome scans: identifying multiple additive QTL on the same chromosome.**

Empirical null distributions obtained by 1000 permutations (upper panels) and distributions of chromosome self-self pair maximums (lower panels). Each permutation retains the maximum conditional additive LOD score for each trait (upper panels). Red vertical lines correspond to 0.1 and 0.05 significance thresholds. (A) Mean growth rate in 0.22mM glucose, (B) growth rate variability in 0.22mM glucose, (C) median lag duration in 0.22mM glucose, (D) lag variability in 0.22mM glucose, (E) mean growth rate in 4.44mM glucose, (F) growth rate variability in 4.44mM glucose. For mean growth rate in 0.22mM glucose, two chromosomes (VII and X) passed the conditional-additive threshold but only the pair of loci on chromosome VII passed the additive threshold.

# Figure S12

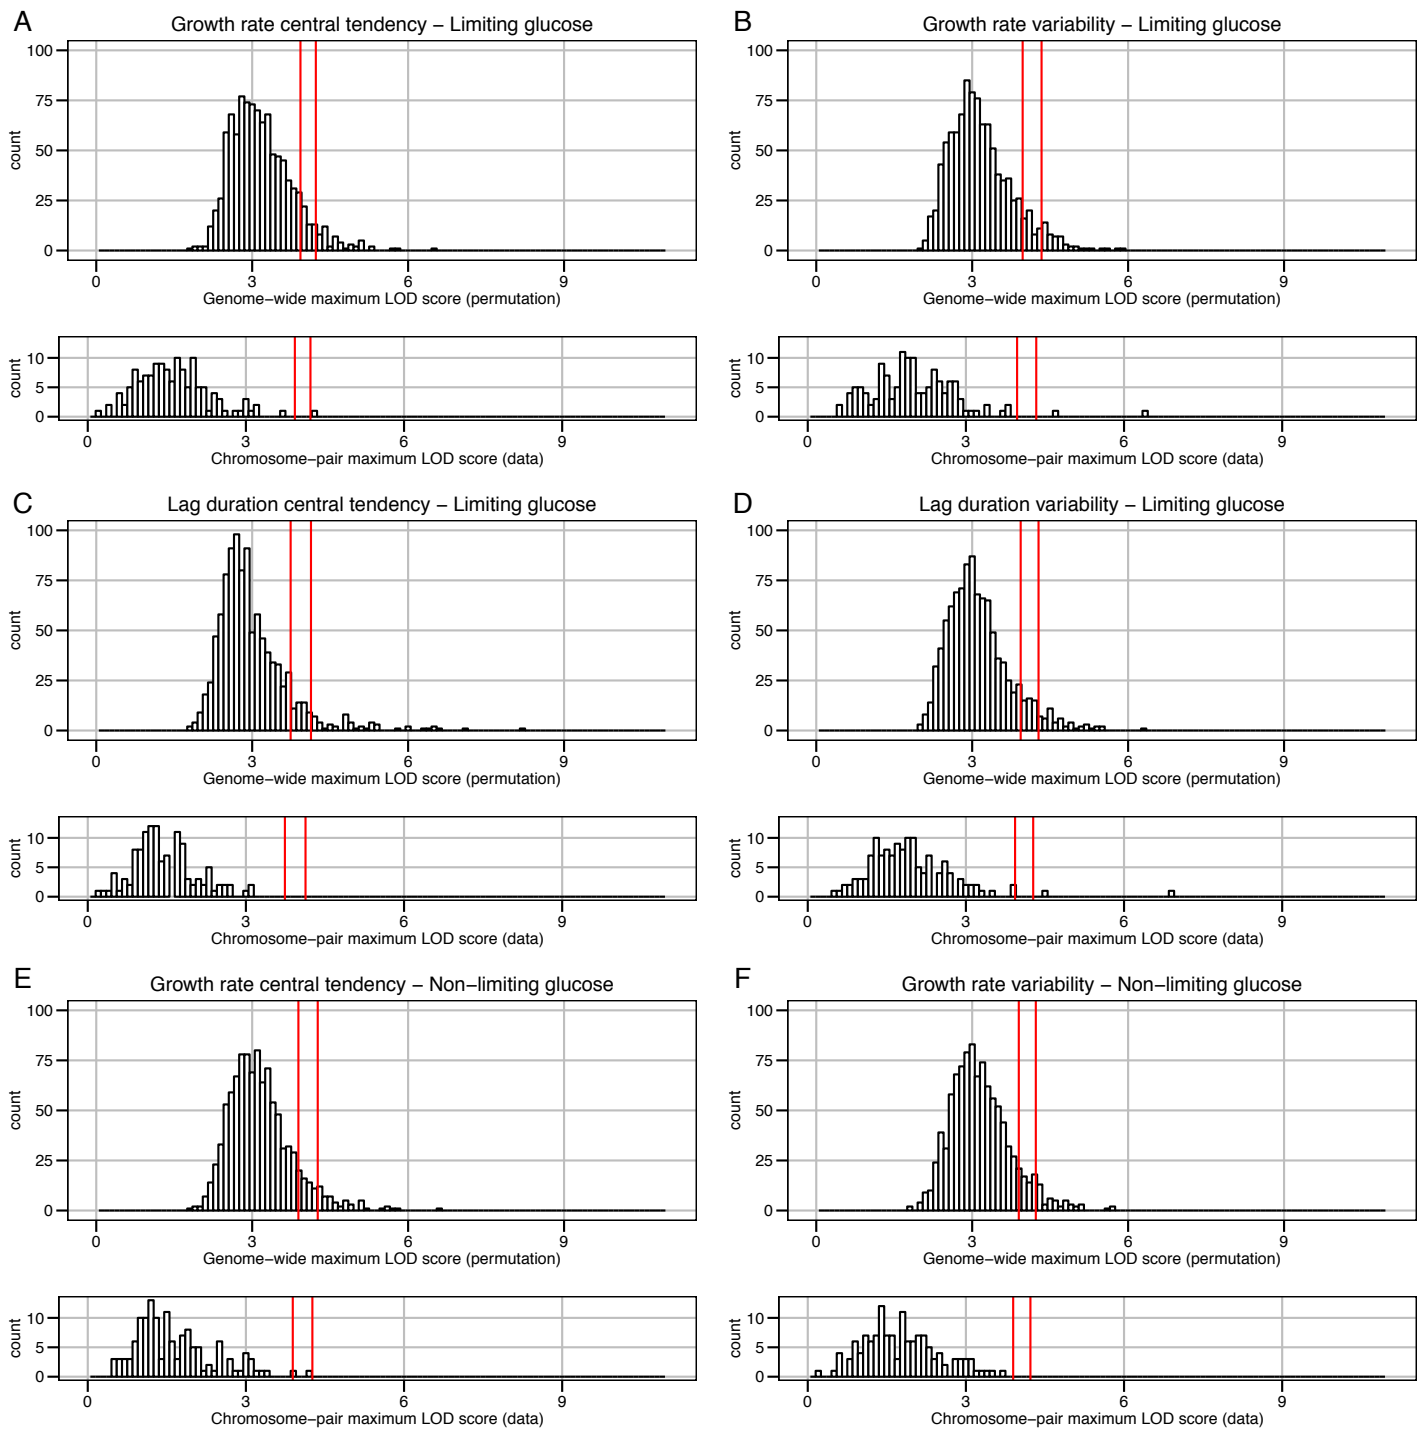

**Figure S12 - Permutations for two QTL genome scans: identifying genetic interactions.**

Empirical null distributions obtained by 1000 permutations (upper panels) and distributions of chromosome pair maximums (lower panels). Each permutation retains the maximum interaction LOD score for each trait (upper panels). Red vertical lines correspond to 0.1 and 0.05 significance thresholds. (A) Mean growth rate in 0.22mM glucose, (B) growth rate variability in 0.22mM glucose, (C) median lag duration in 0.22mM glucose, (D) lag variability in 0.22mM glucose, (E) mean growth rate in 4.44mM glucose, (F) growth rate variability in 4.44mM glucose.

**Table S1. LOD scores for single QTL model determined by genome-wide interval mapping.**

LOD scores for all loci identified in this study including additive QTL and genetic interactions. Positions are shown in cM as well as approximate physical location (in bp) based on known genomic location of markers. LOD scores are shown for all traits and are maximum value within 30cM of position. GR-growth rate, GR.V-growth rate variability, Lag-lag duration, Lag.V-lag duration variability, Chr.-chromosome, 'low' and 'high' correspond to glucose concentration.

| Trait       | Chr. | Position (cM) | Position (bp) | GR. (low) | GR.V (low) | Lag (low) | Lag.V (low) | GR. (high) | GR.V (high) |
|-------------|------|---------------|---------------|-----------|------------|-----------|-------------|------------|-------------|
| GR. (low)   | 4    | 421           | 1160904       | 41.809    | 1.84       | 6.177     | 7.155       | 3.251      | 1.504       |
| GR. (low)   | 7    | 194           | 604096        | 8.965     | 0.708      | 8.535     | 1.277       | 3.282      | 0.048       |
| GR. (low)   | 8    | 13            | 62967         | 3.098     | 0.615      | 0.142     | 0.864       | 0.26       | 0.497       |
| GR. (low)   | 9    | 85.209        | 224632        | 2.892     | 0.243      | 1.764     | 1.451       | 2.985      | 1.927       |
| GR. (low)   | 11   | 79            | 268728        | 3.691     | 0.09       | 0.989     | 0.891       | 3.955      | 0.1         |
| GR. (low)   | 15   | 51.783        | 150756        | 5.029     | 0.682      | 10.916    | 0.833       | 2.674      | 1.781       |
| GR. (low)   | 7    | 30            | 137644        | 4.101     | 0.329      | 0.818     | 0.93        | 5.439      | 0.615       |
| GR. (low)   | 11   | 200           | 588873        | 0.705     | 0.752      | 0.337     | 1.288       | 0.176      | 0.288       |
| GR. (low)   | 12   | 360           | 1002860       | 0.007     | 0.008      | 0.09      | 0.284       | 1.354      | 0.704       |
| GR.V (low)  | 1    | 69            | 162928        | 0.737     | 0.142      | 1.23      | 0.106       | 0.468      | 1.113       |
| GR.V (low)  | 10   | 154           | 412254        | 1.054     | 0.086      | 1.361     | 0.464       | 1.171      | 0.281       |
| GR.V (low)  | 3    | 76            | 141885        | 0.357     | 0.273      | 0.203     | 0.85        | 0.367      | 0.739       |
| GR.V (low)  | 6    | 5             | 119284        | 0.097     | 0.606      | 0.274     | 0.43        | 0.516      | 0.712       |
| Lag (low)   | 4    | 424.142       | 1179958       | 41.809    | 1.94       | 6.177     | 7.155       | 3.251      | 1.504       |
| Lag (low)   | 7    | 188.801       | 594654        | 8.977     | 0.708      | 8.535     | 1.277       | 3.475      | 0.048       |
| Lag (low)   | 14   | 82            | 361686        | 1.473     | 0.161      | 2.644     | 0.199       | 0.594      | 0.944       |
| Lag (low)   | 15   | 47            | 137707        | 5.029     | 0.712      | 10.916    | 0.833       | 2.674      | 1.781       |
| Lag (low)   | 15   | 350           | 974737        | 1.214     | 0.224      | 3.381     | 0.212       | 2.049      | 0.26        |
| Lag.V (low) | 4    | 423           | 1173031       | 41.809    | 1.894      | 6.177     | 7.155       | 3.251      | 1.504       |
| Lag.V (low) | 1    | 27            | 88087         | 0.705     | 0.297      | 2.054     | 0.004       | 0.17       | 0.621       |
| Lag.V (low) | 4    | 157           | 327970        | 0.349     | 0.275      | 0.214     | 0.537       | 1.228      | 1.924       |
| Lag.V (low) | 1    | 67            | 156762        | 0.737     | 0.172      | 1.319     | 0.004       | 0.468      | 1.113       |
| Lag.V (low) | 10   | 157           | 417725        | 1.054     | 0.129      | 1.361     | 0.002       | 1.242      | 0.281       |
| Lag.V (low) | 9    | 92            | 253032        | 2.892     | 0.243      | 1.735     | 1.176       | 2.985      | 2.693       |
| Lag.V (low) | 14   | 160           | 587945        | 0.315     | 0.249      | 0.329     | 0.525       | 0.341      | 0.105       |
| Lag.V (low) | 12   | 380           | 1033949       | 0.194     | 0.004      | 0.014     | 0.003       | 1.354      | 0.012       |
| Lag.V (low) | 15   | 77            | 214637        | 5.029     | 0.668      | 10.909    | 0.384       | 2.674      | 1.781       |
| GR. (high)  | 4    | 421           | 1160904       | 41.809    | 1.84       | 6.177     | 7.155       | 3.251      | 1.504       |
| GR. (high)  | 7    | 30            | 137644        | 4.112     | 0.329      | 0.818     | 0.93        | 5.429      | 0.615       |
| GR. (high)  | 9    | 85.209        | 224632        | 2.892     | 0.243      | 1.764     | 1.451       | 2.985      | 1.927       |
| GR. (high)  | 11   | 86            | 286752        | 3.691     | 0.09       | 0.989     | 0.891       | 3.955      | 0.1         |
| GR. (high)  | 12   | 229           | 609824        | 0.183     | 0.76       | 1.309     | 0.1         | 5.003      | 4.806       |
| GR. (high)  | 15   | 185           | 528176        | 1.564     | 1.203      | 1.525     | 0.461       | 3.145      | 0.621       |
| GR. (high)  | 16   | 177           | 512955        | 1.018     | 0.229      | 0.683     | 0.247       | 4.181      | 1.543       |
| GR. (high)  | 7    | 156           | 466129        | 8.006     | 0.596      | 8.229     | 0.093       | 3.496      | 0.065       |
| GR. (high)  | 15   | 63            | 179172        | 5.029     | 0.682      | 10.916    | 0.826       | 2.669      | 1.781       |
| GR. (high)  | 4    | 105           | 182578        | 0.251     | 1.273      | 0.103     | 0.844       | 0.269      | 0.124       |
| GR. (high)  | 7    | 255           | 763417        | 4.802     | 0.434      | 2         | 1.194       | 0.162      | 0.251       |
| GR.V (high) | 9    | 146.039       | 361957        | 2.062     | 0.08       | 0.463     | 1.331       | 1.753      | 7.335       |
| GR.V (high) | 12   | 209           | 550479        | 0.21      | 0.76       | 1.116     | 0.27        | 5.003      | 4.806       |

**Table S2. Two QTL model LOD scores determined by interval mapping for all genetic interaction loci and traits.**

Each column specifies one interaction, with position for both loci in cM as well as approximate physical location (in bp) based on position of markers. The additive model and full model LOD scores are shown for the specific pair of positions for all traits. GR-growth rate, GR.V-growth rate variability, Lag-lag duration, Lag.V-lag duration variability, Chr.-chromosome, 'low' and 'high' correspond to glucose concentration.

| Trait                      | GR.<br>(low) | GR.V<br>(low) | GR.V<br>(low) | Lag.V<br>(low) | Lag.V<br>(low) | Lag.V<br>(low) | Lag.V<br>(low) | GR.V<br>(high) |
|----------------------------|--------------|---------------|---------------|----------------|----------------|----------------|----------------|----------------|
| <b>Chr. 1</b>              | 11           | 1             | 3             | 1              | 1              | 9              | 12             | 4              |
| <b>Position 1<br/>(cM)</b> | 200          | 69            | 76            | 27             | 67             | 92             | 380            | 105            |
| <b>Position 1<br/>(bp)</b> | 588873       | 162928        | 141885        | 88087          | 156762         | 253032         | 1033949        | 182578         |
| <b>Chr. 2</b>              | 12           | 10            | 6             | 4              | 10             | 14             | 15             | 7              |
| <b>Position 2<br/>(cM)</b> | 360          | 154           | 5             | 157            | 157            | 160            | 77             | 255            |
| <b>Position 2<br/>(bp)</b> | 1002860      | 412254        | 119284        | 327970         | 417725         | 587945         | 214637         | 763417         |
| GR. (low)<br>Additive      | 0.706        | 0.279         | 0.244         | 0.671          | 0.308          | 2.543          | 2.154          | 2.577          |
| GR. (low)<br>Full          | 5.037        | 1.115         | 0.326         | 0.702          | 1.036          | 2.931          | 3.634          | 3.258          |
| GR.V (low)<br>Additive     | 0.744        | 0.198         | 0.998         | 0.197          | 0.182          | 0.496          | 0.016          | 1.29           |
| GR.V (low)<br>Full         | 0.746        | 6.627         | 5.707         | 2              | 6.512          | 0.523          | 0.037          | 1.347          |
| Lag (low)<br>Additive      | 0.029        | 1.39          | 0.217         | 1.97           | 1.452          | 0.536          | 5.936          | 1.392          |
| Lag (low)<br>Full          | 1.722        | 1.45          | 0.395         | 1.98           | 1.478          | 0.643          | 5.987          | 1.875          |
| Lag.V (low)<br>Additive    | 1.315        | 0.002         | 0.708         | 0.544          | 0.005          | 1.665          | 0.386          | 0.803          |
| Lag.V (low)<br>Full        | 2.141        | 6.538         | 1.104         | 4.492          | 6.879          | 5.599          | 4.888          | 0.913          |
| GR. (high)<br>Additive     | 0.14         | 0.447         | 0.607         | 0.05           | 0.5            | 2.224          | 3.548          | 0.424          |
| GR. (high)<br>Full         | 0.318        | 1.152         | 0.668         | 0.067          | 1.149          | 2.31           | 3.728          | 4.62           |
| GR.V (high)<br>Additive    | 0.267        | 1.123         | 1.362         | 1.661          | 1.098          | 1.002          | 1.535          | 0.053          |
| GR.V (high)<br>Full        | 0.669        | 1.265         | 2.847         | 1.802          | 1.312          | 1.033          | 1.54           | 0.348          |

**Table S3. Comparison of QTL mapping approaches.**

The list of intervals defined by each pair of adjacent markers used in the interval mapping. Each row specifies an interval that had a maximal LOD score greater than 3 in at least one condition. The data include interval mapping in 0.22mM glucose or 4.44mM glucose, bulk segregant analysis of the advanced intercross grown in low or high dilution rate chemostats (scores are for combined replicate data) and bulk segregant analysis of the pool of F2 segregants grown in low or high dilution rate chemostats. MULTIPOOL results are shown with parameters n=1000 (number of individuals) and r=1000 (length of cM). GR-growth rate, 'low' and 'high' correspond to glucose concentration or dilution rate, AIC-advanced intercross.

| Marker 1 | Marker 2 | Position 1 (bp) | Position 2 (bp) | GR. (low) | GR. (high) | F2 (low) | F2 (high) | AIC (low) | AIC (high) |
|----------|----------|-----------------|-----------------|-----------|------------|----------|-----------|-----------|------------|
| L1.1     | L1.2     | 32304           | 65359           | 0.7       | 0.01       | 4.72     | 1.22      | 0.54      | 0.52       |
| L1.2     | L1.3     | 65359           | 112085          | 0.67      | 0.17       | 4.85     | 0.66      | 0.5       | 0.49       |
| L2.1     | L2.2     | 120437          | 157331          | 0.55      | 0.2        | 3.57     | 1.51      | 0.48      | 1.31       |
| L2.2     | L2.3     | 157331          | 232715          | 0.9       | 0.07       | 3.79     | 0.89      | 1.43      | 1.06       |
| L2.6     | L2.7     | 401143          | 470054          | 0.26      | 0.18       | 0.95     | 2         | 3.02      | 1.9        |
| L2.8     | L2.9     | 502224          | 575934          | 0.67      | 0.04       | 6.18     | 0.7       | 1.66      | 0.79       |
| L2.9     | L2.10    | 575934          | 656829          | 0.17      | 0.04       | 6.1      | 0.5       | 1.85      | 0.6        |
| L2.11    | L2.12    | 702460          | 771102          | 0.01      | 0.02       | 5.49     | 1.78      | 3.28      | 1.24       |
| L3.4     | L3.5     | 188786          | 225558          | 0.36      | 0.54       | 1.15     | 3.14      | 2.61      | 0.49       |
| L4.1     | L4.2     | 49679           | 114170          | 0.01      | 0.02       | 2.39     | 1.69      | 5.8       | 1.79       |
| L4.2     | L4.3     | 114170          | 151239          | 0.25      | 0.42       | 1.56     | 1.38      | 5.42      | 0.68       |
| L4.3     | L4.4     | 151239          | 246448          | 0.25      | 0.42       | 7.06     | 0.98      | 5.6       | 0.64       |
| L4.4     | L4.5     | 246448          | 280697          | 0.01      | 0.03       | 6.42     | 0.66      | 1.61      | 1.2        |
| L4.5     | L4.6     | 280697          | 346360          | 0.05      | 0.03       | 2.83     | 0.55      | 2.84      | 3.41       |
| L4.12    | L4.13    | 635526          | 696637          | 0.63      | 0.99       | 1.02     | 4.09      | 1.65      | 1.78       |
| L4.15    | L4.16    | 826861          | 938147          | 6.44      | 0.84       | 15.13    | 7.44      | 3.55      | 1.59       |
| L4.16    | L4.17    | 938147          | 1005614         | 9.79      | 1.04       | 24.21    | 9.57      | 4.95      | 1.56       |
| L4.17    | L4.18    | 1005614         | 1071559         | 20.35     | 1.55       | 31.39    | 16.66     | 16.07     | 1.71       |
| L4.18    | L4.19    | 1071559         | 1105164         | 30.71     | 2.49       | 44.2     | 21.63     | 30.66     | 4.87       |
| L4.19    | L4.20    | 1105164         | 1179958         | 41.81     | 3.25       | 60.1     | 21.82     | 54.97     | 13.09      |
| L4.20    | L4.21    | 1179958         | 1230646         | 40.53     | 3.19       | 59.81    | 18.75     | 27.15     | 10.87      |
| L4.21    | L4.22    | 1230646         | 1264123         | 34.55     | 2.61       | 42.53    | 13.19     | 17.25     | 6.68       |
| L4.22    | L4.23    | 1264123         | 1362236         | 15.45     | 1.11       | 11.49    | 4.26      | 4.57      | 4          |
| L4.23    | L4.25    | 1362236         | 1501556         | 4.41      | 0.45       | 8.01     | 0.85      | 0.71      | 0.82       |
| L5.1     | L5.2     | 49043           | 100056          | 0.17      | 1.17       | 9.51     | 2.47      | 4.09      | 2.25       |
| L5.2     | L5.3     | 100056          | 158171          | 0.1       | 0.1        | 9.39     | 3.43      | 3.73      | 2.61       |
| L5.3     | L5.4     | 158171          | 217279          | 0.1       | 0.14       | 5.64     | 3.94      | 3.98      | 1.42       |
| L5.4     | L5.5     | 217279          | 338773          | 0.3       | 0.36       | 3.09     | 1.77      | 4.79      | 0.72       |
| L5.5     | L5.6     | 338773          | 399605          | 0.3       | 0.36       | 2.39     | 0.62      | 3.58      | 0.45       |
| L6.3     | L6.4     | 170876          | 201882          | 0.04      | 0.32       | 0.51     | 1.37      | 3.71      | 0.64       |
| L6.4     | L6.5     | 201882          | 223558          | 0.25      | 0.24       | 0.49     | 0.71      | 3.25      | 0.48       |
| L7.1     | L7.2     | 44796           | 96932           | 3.48      | 4.11       | 5.07     | 5.97      | 2.2       | 0.88       |
| L7.2     | L7.3     | 96932           | 171763          | 4.11      | 5.44       | 5.14     | 5.99      | 3.55      | 0.67       |
| L7.3     | L7.4     | 171763          | 230207          | 3.79      | 4.83       | 3.66     | 3.43      | 2.86      | 0.7        |
| L7.4     | L7.5     | 230207          | 284675          | 2.63      | 2.97       | 3.22     | 4.07      | 0.53      | 0.58       |
| L7.7     | L7.8     | 432466          | 490117          | 5         | 3.5        | 4.91     | 0.86      | 0.63      | 1.35       |
| L7.8     | L7.9     | 490117          | 545582          | 5.51      | 2.96       | 4.73     | 1.39      | 0.53      | 0.72       |



|        |        |        |        |      |      |       |      |       |      |
|--------|--------|--------|--------|------|------|-------|------|-------|------|
| L7.9   | L7.11  | 545582 | 594654 | 8.84 | 3.05 | 1.38  | 1.49 | 0.41  | 0.46 |
| L7.11  | L7.12  | 594654 | 644097 | 8.98 | 2.97 | 1.46  | 1.7  | 1.49  | 0.46 |
| L7.12  | L7.13  | 644097 | 726509 | 4.8  | 0.75 | 1.3   | 0.93 | 2.85  | 1.25 |
| L7.13  | L7.14  | 726509 | 763036 | 3.26 | 0.64 | 0.55  | 0.55 | 2.96  | 0.58 |
| L7.15  | L7.16  | 809363 | 863960 | 3.05 | 0.72 | 1.61  | 0.72 | 1.61  | 0.51 |
| L7.16  | L7.17  | 863960 | 892563 | 3.05 | 0.89 | 1.66  | 0.62 | 1.36  | 0.5  |
| L8.1   | L8.2   | 44529  | 66740  | 3.1  | 0.26 | 8.36  | 2.33 | 10.71 | 0.73 |
| L8.2   | L8.3   | 66740  | 117292 | 3.07 | 0.14 | 13.06 | 3.9  | 13.93 | 0.51 |
| L8.3   | L8.4   | 117292 | 153282 | 0.53 | 0.14 | 9.59  | 3.5  | 15.54 | 0.5  |
| L8.4   | L8.5   | 153282 | 198394 | 0.15 | 0.31 | 3.18  | 2.95 | 8.85  | 0.82 |
| L8.5   | L8.6   | 198394 | 218718 | 0.22 | 0.31 | 0.9   | 1.29 | 4.98  | 0.96 |
| L8.6   | L8.7   | 218718 | 256537 | 0.22 | 0.08 | 1.15  | 1.3  | 4.41  | 0.89 |
| L8.7   | L8.8   | 256537 | 297020 | 0.21 | 0.01 | 2.11  | 0.42 | 3.18  | 0.97 |
| L8.8   | L8.9   | 297020 | 396688 | 0.2  | 0.12 | 4.62  | 0.53 | 3.81  | 2.17 |
| L9.5   | L9.6   | 201167 | 224632 | 2.89 | 2.99 | 1.87  | 4.13 | 1.93  | 0.64 |
| L9.6   | L9.7   | 224632 | 250317 | 2.89 | 2.99 | 2.12  | 4.94 | 0.53  | 0.65 |
| L9.7   | L9.8   | 250317 | 276759 | 2.83 | 2.2  | 2.24  | 4.69 | 0.76  | 0.66 |
| L10.1  | L10.2  | 37500  | 66255  | 1.16 | 1.97 | 3.89  | 1.31 | 1.47  | 0.65 |
| L10.5  | L10.6  | 219800 | 270368 | 0.58 | 0.58 | 3.29  | 2.63 | 1.72  | 1.54 |
| L10.8  | L10.9  | 336551 | 385727 | 0.63 | 0.71 | 1.49  | 4.67 | 1.35  | 1.26 |
| L10.9  | L10.10 | 385727 | 444535 | 0.83 | 0.64 | 1.2   | 8.76 | 1.28  | 2.63 |
| L10.10 | L10.11 | 444535 | 465360 | 1.05 | 1.27 | 0.79  | 8.63 | 0.68  | 2.85 |
| L10.11 | L10.12 | 465360 | 527586 | 1    | 1.27 | 1.99  | 6.69 | 0.45  | 2.19 |
| L10.12 | L10.13 | 527586 | 565916 | 0.51 | 0.06 | 5.56  | 0.69 | 0.57  | 0.58 |
| L10.13 | L10.14 | 565916 | 619631 | 0.8  | 0.15 | 6.27  | 2.24 | 0.59  | 1.14 |
| L10.14 | L10.15 | 619631 | 660770 | 0.77 | 0.26 | 6.4   | 1.78 | 0.91  | 1.09 |
| L10.15 | L10.16 | 660770 | 690593 | 0.68 | 0.86 | 1.96  | 0.42 | 3.08  | 0.49 |
| L11.1  | L11.2  | 42555  | 98234  | 0.01 | 0.02 | 4.73  | 6.84 | 2.41  | 1.12 |
| L11.2  | L11.3  | 98234  | 153726 | 1.21 | 1.44 | 2.07  | 4.79 | 2.25  | 2.2  |
| L11.4  | L11.5  | 206087 | 249055 | 3.32 | 2.56 | 1.28  | 3.55 | 1.87  | 1.98 |
| L11.5  | L11.6  | 249055 | 295134 | 3.69 | 3.95 | 0.49  | 3.55 | 2.54  | 2.35 |
| L11.6  | L11.7  | 295134 | 350464 | 3.03 | 3.9  | 0.55  | 1.64 | 0.79  | 0.47 |
| L11.11 | L11.12 | 504700 | 550500 | 1.02 | 0.16 | 0.86  | 4.57 | 0.61  | 0.94 |
| L11.12 | L11.13 | 550500 | 575225 | 0.94 | 0.09 | 1.49  | 4.35 | 0.43  | 2    |
| L11.13 | L11.14 | 575225 | 611629 | 0.71 | 0.18 | 2.37  | 5.65 | 0.41  | 3.61 |
| L11.14 | L11.15 | 611629 | 637800 | 0.52 | 0.18 | 1.87  | 7.97 | 0.41  | 3.92 |
| L12.2  | L12.3  | 89702  | 154678 | 0.34 | 0.05 | 0.52  | 0.84 | 4.99  | 2.04 |
| L12.3  | L12.4  | 154678 | 213608 | 0.17 | 0.11 | 0.73  | 1    | 5.96  | 2.2  |
| L12.6  | L12.7  | 311265 | 367241 | 0.33 | 1.07 | 3.18  | 5.15 | 0.86  | 0.66 |
| L12.7  | L12.8  | 367241 | 451216 | 0.33 | 2.54 | 2.11  | 5    | 2.37  | 1.03 |
| L12.9  | L12.10 | 492640 | 518152 | 0.21 | 3.64 | 1.29  | 0.65 | 1.99  | 0.41 |
| L12.10 | L12.11 | 518152 | 561785 | 0.1  | 4.17 | 0.84  | 0.69 | 2.39  | 0.66 |
| L12.11 | L12.12 | 561785 | 672637 | 0.07 | 5    | 2.72  | 4.01 | 2.22  | 1.38 |
| L12.12 | L12.13 | 672637 | 717712 | 0.32 | 3.29 | 1.28  | 4.13 | 2.79  | 1.54 |
| L12.13 | L12.14 | 717712 | 755968 | 0.91 | 3.49 | 2.96  | 2.23 | 2.76  | 1.57 |
| L12.14 | L12.15 | 755968 | 820804 | 0.91 | 3.49 | 6.65  | 3.55 | 2.07  | 3    |
| L12.15 | L12.16 | 820804 | 881789 | 0.06 | 0.87 | 9.32  | 4.28 | 0.81  | 2.46 |

|        |        |        |         |      |      |       |       |      |      |
|--------|--------|--------|---------|------|------|-------|-------|------|------|
| L12.16 | L12.17 | 881789 | 969370  | 0.06 | 0.05 | 7.71  | 0.51  | 1.7  | 0.78 |
| L12.17 | L12.18 | 969370 | 990749  | 0.07 | 0.02 | 9.87  | 0.46  | 1.36 | 0.81 |
| L12.18 | L12.19 | 990749 | 1034324 | 0.19 | 1.35 | 9.87  | 0.68  | 1.63 | 1.1  |
| L13.1  | L13.2  | 56276  | 102221  | 0.36 | 0.13 | 3.62  | 0.51  | 1.4  | 0.71 |
| L13.5  | L13.6  | 244520 | 308353  | 1.53 | 0.88 | 4.62  | 3.24  | 3.65 | 0.48 |
| L13.6  | L13.7  | 308353 | 341111  | 2.51 | 0.98 | 10.24 | 2.39  | 3.88 | 0.51 |
| L13.7  | L13.8  | 341111 | 396424  | 2.51 | 0.92 | 8.93  | 2.17  | 2.88 | 0.62 |
| L13.8  | L13.9  | 396424 | 502787  | 1.55 | 0.63 | 8.55  | 2.5   | 2.16 | 1.52 |
| L13.9  | L13.10 | 502787 | 555633  | 0.82 | 0.62 | 5.98  | 2.25  | 1.99 | 1.76 |
| L13.16 | L13.17 | 858414 | 914425  | 0.81 | 0.09 | 4.86  | 3.14  | 1.42 | 1.38 |
| L14.4  | L14.5  | 231538 | 288198  | 1.06 | 0.02 | 1.38  | 4.18  | 1.43 | 3.19 |
| L14.5  | L14.6  | 288198 | 340447  | 1.36 | 0.07 | 2.47  | 8.73  | 1.77 | 3.93 |
| L14.6  | L14.7  | 340447 | 387811  | 1.47 | 0.27 | 2.93  | 8.71  | 1.65 | 3.07 |
| L14.7  | L14.8  | 387811 | 437370  | 1.44 | 0.55 | 2.39  | 5.7   | 1.07 | 1.17 |
| L14.8  | L14.9  | 437370 | 466584  | 1.06 | 0.59 | 1.25  | 4.22  | 0.64 | 1.31 |
| L14.9  | L14.10 | 466584 | 502292  | 0.35 | 0.57 | 3.76  | 4.15  | 0.41 | 0.45 |
| L14.10 | L14.11 | 502292 | 558811  | 0.05 | 0.28 | 10.31 | 2.68  | 1.45 | 0.45 |
| L14.11 | L14.13 | 558811 | 635465  | 0.31 | 0.04 | 11.16 | 1.08  | 3.58 | 0.94 |
| L14.13 | L14.14 | 635465 | 694158  | 0.31 | 0.29 | 5.32  | 1.38  | 4.78 | 0.61 |
| L14.14 | L14.15 | 694158 | 745494  | 0.25 | 0.29 | 3.02  | 2     | 4.8  | 0.46 |
| L15.1  | L15.2  | 51154  | 88251   | 1.34 | 0.27 | 3.19  | 9.3   | 0.93 | 4.09 |
| L15.2  | L15.3  | 88251  | 150756  | 5.03 | 2.22 | 3.38  | 1.56  | 0.5  | 2.29 |
| L15.3  | L15.4  | 150756 | 215310  | 5.03 | 2.67 | 4.59  | 2.69  | 1.36 | 2.1  |
| L15.4  | L15.5  | 215310 | 280789  | 1.92 | 2.16 | 4.64  | 1.34  | 1.46 | 1.71 |
| L15.5  | L15.6  | 280789 | 346309  | 0.29 | 0.13 | 4.74  | 0.66  | 0.64 | 1.97 |
| L15.6  | L15.7  | 346309 | 407363  | 0.21 | 0    | 5.16  | 0.52  | 2.33 | 1.89 |
| L15.7  | L15.8  | 407363 | 454325  | 0.55 | 0.27 | 5.85  | 1.21  | 2.69 | 1.51 |
| L15.8  | L15.9  | 454325 | 523989  | 1.56 | 3.13 | 6.11  | 3.37  | 1.35 | 0.88 |
| L15.9  | L15.10 | 523989 | 572941  | 1.55 | 3.15 | 2.77  | 2.65  | 1.26 | 0.93 |
| L15.13 | L15.14 | 693081 | 747648  | 1.25 | 0.72 | 3.31  | 1.39  | 1.77 | 0.65 |
| L15.14 | L15.15 | 747648 | 804445  | 1.25 | 0.73 | 7.23  | 2.9   | 0.46 | 1.17 |
| L15.15 | L15.16 | 804445 | 826784  | 0.48 | 0.48 | 7.23  | 2.61  | 0.45 | 1.32 |
| L15.16 | L15.17 | 826784 | 870951  | 0.29 | 1.05 | 7.27  | 2.41  | 0.46 | 1.14 |
| L15.17 | L15.18 | 870951 | 898552  | 1.44 | 2.18 | 4.57  | 1.72  | 0.54 | 0.95 |
| L15.18 | L15.19 | 898552 | 912655  | 1.44 | 2.18 | 3.46  | 1.74  | 1.33 | 0.91 |
| L16.6  | L16.7  | 266276 | 324298  | 0.43 | 0.7  | 0.45  | 3.24  | 1.16 | 3.73 |
| L16.7  | L16.8  | 324298 | 372267  | 0.05 | 1.95 | 1.08  | 6.32  | 0.85 | 4.06 |
| L16.8  | L16.9  | 372267 | 429004  | 0.54 | 2.95 | 0.75  | 8.96  | 0.51 | 2.91 |
| L16.9  | L16.10 | 429004 | 482737  | 0.82 | 3.12 | 3.72  | 8.77  | 0.59 | 3.34 |
| L16.10 | L16.11 | 482737 | 536003  | 0.85 | 4.18 | 8.73  | 9.38  | 0.41 | 7.4  |
| L16.11 | L16.12 | 536003 | 593104  | 0.41 | 3.48 | 7.92  | 12.67 | 0.49 | 7.26 |
| L16.12 | L16.13 | 593104 | 648617  | 1.28 | 2.91 | 5.46  | 16.3  | 0.68 | 4.26 |
| L16.13 | L16.14 | 648617 | 745578  | 1.28 | 2.5  | 0.83  | 16.16 | 1.19 | 2.87 |

**File S1 (uploaded separately). *HXT6* and *HXT7* sequences in the oak and vineyard strains.**

FASTA file containing Oak and Vineyard HXT6 and HXT7 open reading frames, downstream and upstream sequences determined by cloning the loci and performing sanger sequencing.
